# Supplementary material for: Organic single-crystalline whispering-gallery mode microlasers with efficient optical gain activated via excited state intramolecular proton transfer luminogens
Source: Royal Society of Chemistry journal article supplement (doi:10.1039/d0tc02881a), 2020-01-01
Supplement: d0tc02881a1.pdf [file d0tc02881a1.pdf]

**Organic Single-Crystalline Whispering-Gallery Mode Microlasers with Efficient  
Optical Gain Activated via Excited State Intramolecular Proton Transfer Luminogen**

Guo-Qing Wei,<sup>1</sup> Yue Yu <sup>1</sup>, Ming-Peng Zhuo,<sup>1</sup> Xue-Dong Wang\*<sup>1</sup>, and Liang-Sheng Liao\*<sup>1,2</sup>

<sup>1</sup> Jiangsu Key Laboratory for Carbon-Based Functional Materials & Devices, Institute of Functional Nano & Soft Materials (FUNSOM), Soochow University, Suzhou, Jiangsu 215123, P.R. China

<sup>2</sup> Institute of Organic Optoelectronics, Jiangsu Industrial Technology Research Institute (JITRI), Wujiang, Suzhou, Jiangsu 215211, P. R. China

\*Corresponding Author(s): Xue-Dong Wang and Liang-Sheng Liao

Email Address: wangxuedong@suda.edu.cn; lsiao@suda.edu.cn

## **Experimental details**

### **Materials:**

Organic compound 1,5-dihydroxyanthraquinone (1,5-DHAQ) was purchased from Shanghai Dibai Biological Technology Inc., and used without further purification. 1-Hydroxy-5-methoxyanthraquinone (HMAQ) was purchased from Atomax Chemicals Co.,Ltd, and used without further purification.

### **Preparation of 1,5-DHAQ microdisks:**

The 1,5-DHAQ microdisks (MDs) were prepared by the facile solution-drying method. with the mixed solvent of dichloromethane (DCM) and acetonitrile. In a typical preparation process, 0.5 mg of 1,5-DHAQ powder was dissolved in 1 mL DCM. Then 1 mL of acetonitrile was added into this 1,5-DHAQ/DCM solution, which means that volume ratio of DCM and acetonitrile was 1:1. After shaking for a while, the well-mixed solution was dropped onto a quartz substrate, which was then covered with a watch glass. The 1,5-DHAQ MDs can be obtained dominantly when the solvents gradually evaporated.

### **Characterizations:**

The steady-state fluorescence spectra of the samples were measured by a HITACHI F-4600 fluorescence spectrophotometer. Meanwhile, the time-resolved femtosecond fluorescence up-conversion measurement were performed using a Pharos femtosecond laser system (Light Conversion; 1030 nm, 250 fs, 200 uJ/pulse and 100 kHz repetition frequency) and a HARPIA-TF upconversion system incorporated with TCSPC module. The fluorescence microscopy images were obtained using a Leica DMRBE fluorescence microscope with a spot-enhanced charge couple device (CCD, Diagnostic Instrument, Inc.). The samples were prepared by placing a drop of dispersion onto a cleaned quartz slide. TEM images were obtained by a transmission electron microscopy (TEM, FEI company, Tecnai G2 F20, United States). One drop of the solution was dropped on a carbon-coated copper grid, and evaporated at room temperature. TEM measurement was performed at an accelerating voltage of 20 kV. Micro-area photoluminescence ( $\mu$ -PL) spectra were collected on a homemade optical microscopy and the equipment were set up as shown in the Scheme S1. The light was coupled to a grating spectrometer (Princeton Instrument,

ARC-SP-2356) and recorded by a thermal-electrically cooled CCD (Princeton Instruments, PIX-256E). PL microscopy images were taken with an inverted microscope (Olympus, BX43). The single crystal XRD data were collected at 120 K on a Bruker SMART APEX II, Mo  $K\alpha$  ( $\lambda = 0.71073 \text{ \AA}$ ). The data were processed with Denzocscalepack. Solution and refinement: Structures were solved by direct methods with SHELXS. Full matrix least-squares refinement on the basis of  $F^2$  with SHELXS-97. Refinement of  $F^2$  was against all reflections. Stacking distances were determined by calculating the best plane through a ring and subsequent determination of the distance of the ring atoms of the neighboring molecule and averaging of these distances.

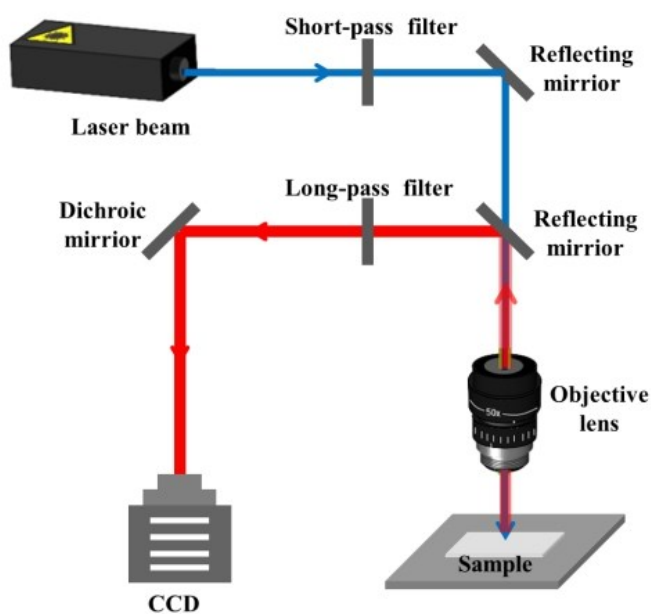

**Figure S1.** Schematic demonstration of the experimental setup for the optical characterization.

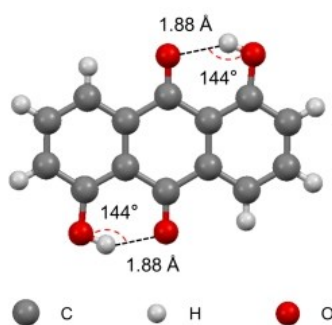

**Figure S2.** Schematic of the molecular structure of 1,5-DHAQ.

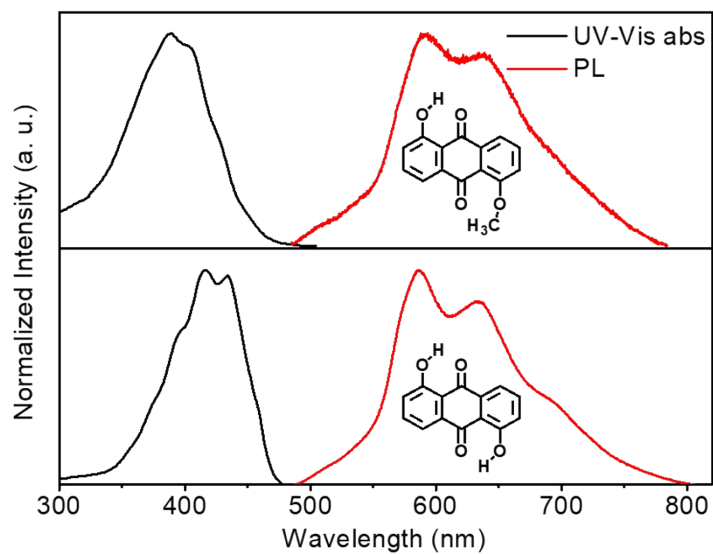

**Figure S3.** The UV-Vis absorption and PL spectra of HMAQ (top) and 1,5-DHAQ (bottom) doped in polystyrene spheres. The top and bottom insets show the molecular structures of HMAQ and 1,5-DHAQ respectively.

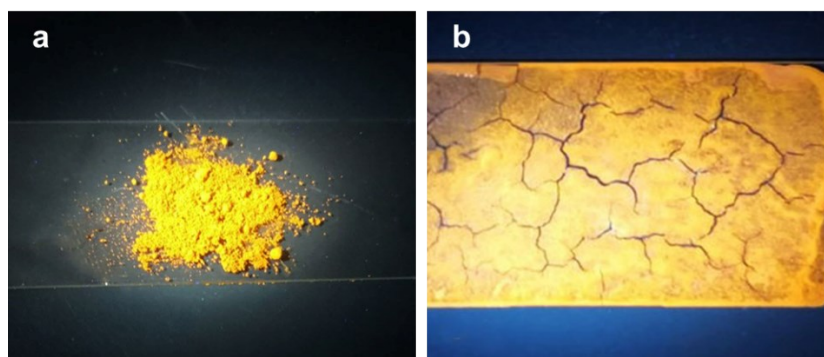

**Figure S4.** Pictures of 1,5-DHAQ powder (a) and solid state solution (b) under 365 nm UV exposure.

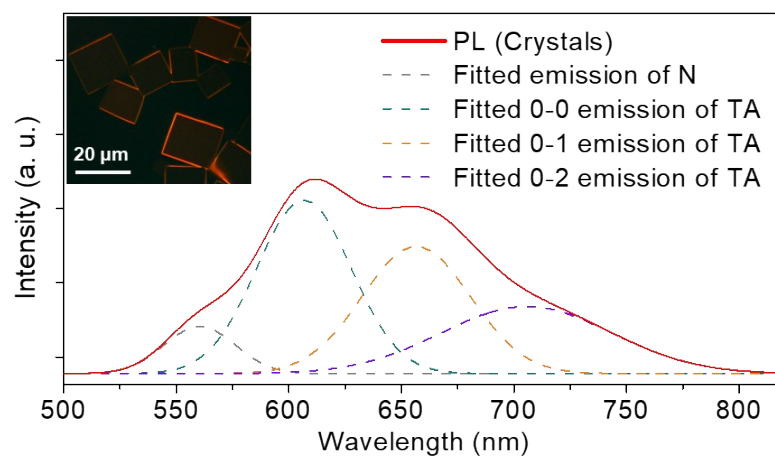

**Figure S5.** PL spectra of 1,5-DHAQ MDs fitted with lorentzian line shapes displaying the emission bands from the normal form and the vibrational emissions of tautomer A. Inset: The PL image of some MDs of 1,5-DHAQ excited with 375 nm UV beam.

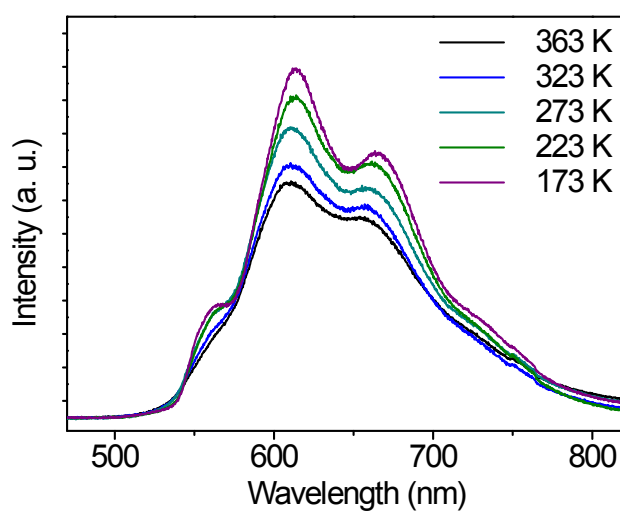

**Figure S6.** Temperature-dependent PL spectra of 1,5-DHAQ MDs excited with 375 nm UV beam.

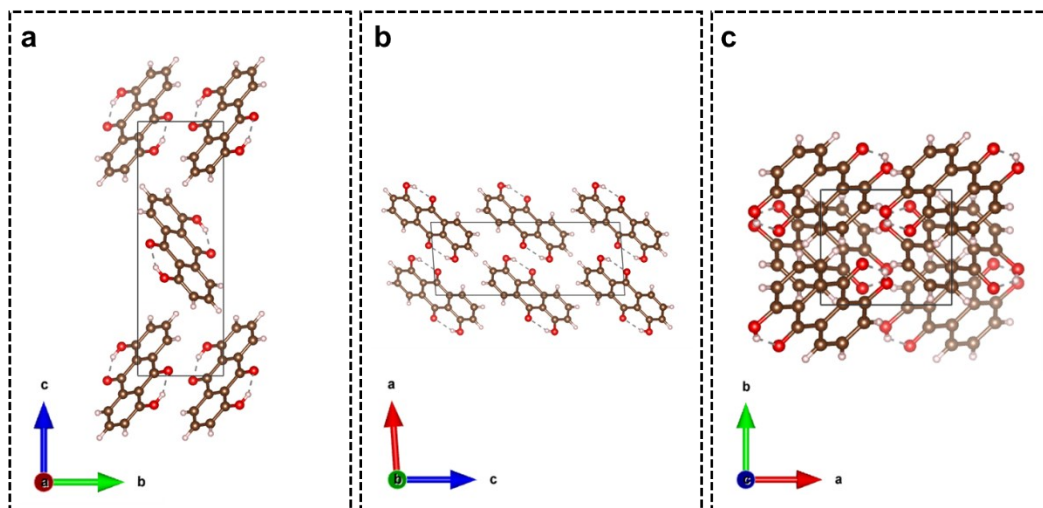

**Figure S7.** The unit cell structure of 1,5-DHAQ MD from different views along a) *a* axis; b) *b* axis; c) *c* axis.

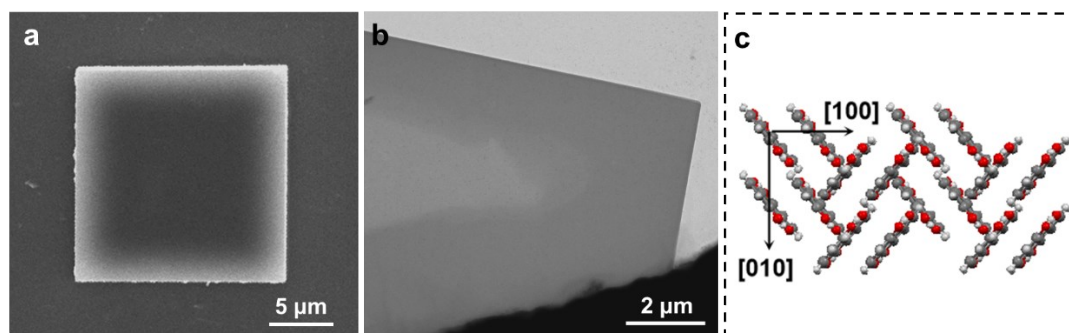

**Figure S8.** a) SEM image of an individual 1,5-DHAQ MD. b) TEM image of an individual 1,5-DHAQ MD. c) Schematic of the molecular packing in 1,5-DHAQ MDs.

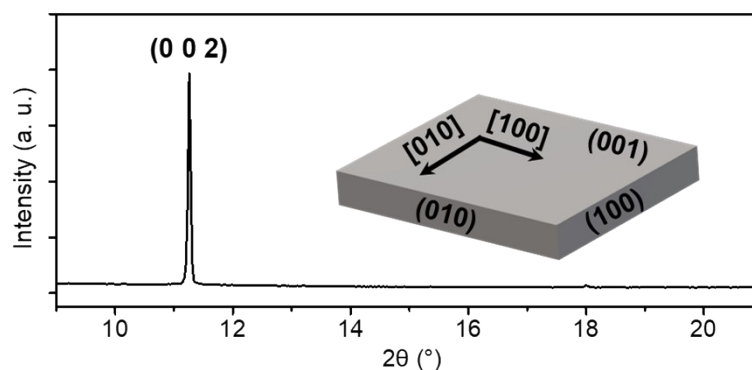

**Figure S9.** XRD patterns of 1,5-DHAQ MDs. Inset: Schematic of the 1,5-DHAQ crystal morphology with labeled crystal planes.

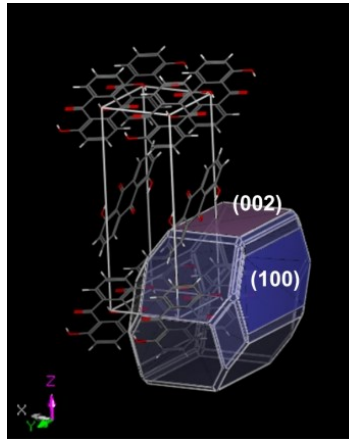

**Figure S10.** The simulated equilibrium morphology of 1,5-DHAQ crystal by using Material Studio package.

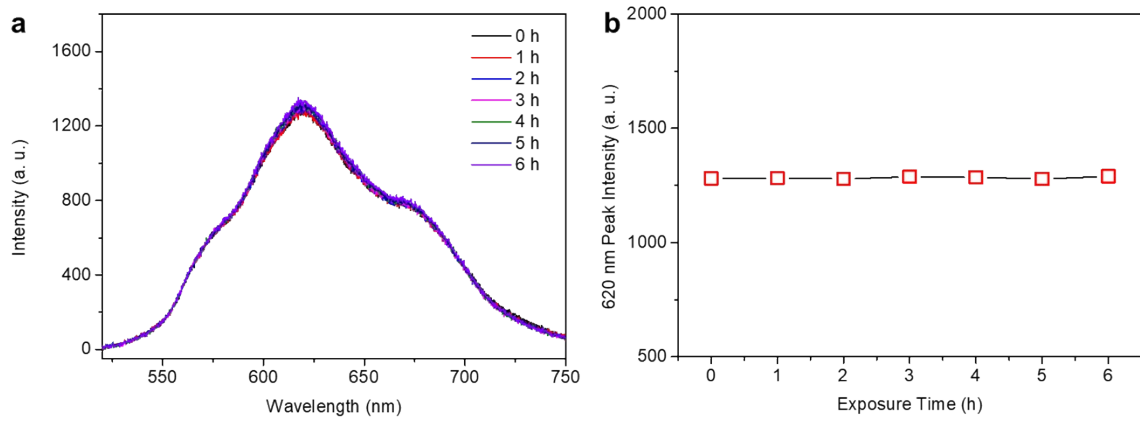

**Figure S11.** (a) PL spectra of an individual 1,5-DHAQ crystal under 375 nm UV exposure for 6 hours. (b) The 620 nm peak PL intensity change of the 1,5-DHAQ crystal with respect to exposure time.

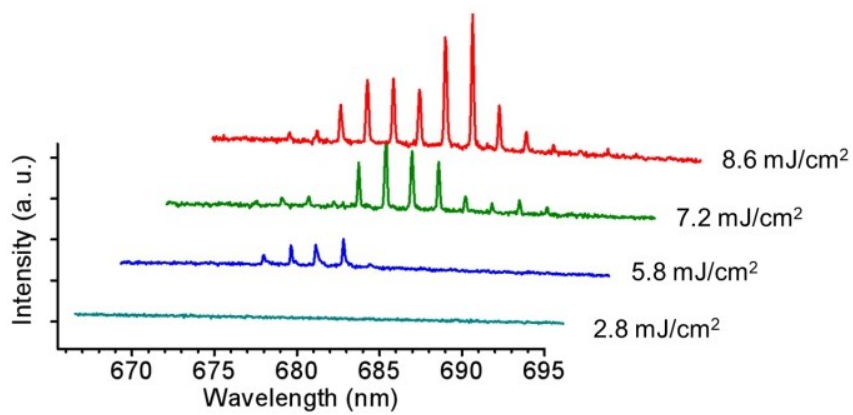

**Figure S12.** Multiple mode lasing measured from the MDs of 1,5-DHAQ with side length  $l = 16.4 \mu\text{m}$

**Table S1.** The unit cell of the 1,5-DHAQ single crystal (CCDC No. 1965075).

|                         |                |
|-------------------------|----------------|
| Formula                 | $C_{14}H_8O_4$ |
| Formula weight          | 240.0          |
| Crystal system          | monoclinic     |
| Space group             | $P 2_1/c$      |
| $a$ (Å)                 | 6.0211         |
| $b$ (Å)                 | 5.2723         |
| $c$ (Å)                 | 15.6347        |
| $\alpha$ (°)            | 90.000         |
| $\beta$ (°)             | 94.048         |
| $\gamma$ (°)            | 90.000         |
| $V$ (Å <sup>3</sup> )   | 495.086        |
| Cell formula units, $Z$ | 2              |
| $R$ -factor (%)         | 4.08           |

**Table S2.** The simulated parameters of the growth morphology of 1,5-DHAQ single crystals.

| $hkl$ | $d_{hkl}$ (Å) | Relative surface area | $E_{att}$ (kJ mol <sup>-1</sup> ) | Total facet area (%) |
|-------|---------------|-----------------------|-----------------------------------|----------------------|
|-------|---------------|-----------------------|-----------------------------------|----------------------|



|          |            |              |              |             |
|----------|------------|--------------|--------------|-------------|
| {0 0 2}  | 7.79784775 | 31.74504553  | -25.39477714 | 31.22675748 |
| {1 0 0}  | 6.00607893 | 82.43082881  | -26.39638856 | 34.45905223 |
| {0 1 1}  | 4.99461360 | 99.12399717  | -34.06011195 | 31.88471285 |
| {1 0 -2} | 4.92947876 | 100.43375543 | -40.51310733 |             |
| {1 0 2}  | 4.60376350 | 107.53942148 | -33.47947664 | 2.42947745  |
| {0 1 2}  | 4.36766418 | 113.35259398 | -39.57575747 |             |
| {1 1 0}  | 3.96225338 | 124.95063200 | -51.84888857 |             |
| {1 1 -1} | 3.88365974 | 127.47925858 | -53.47258639 |             |
| {1 1 1}  | 3.79827024 | 130.34513929 | -50.25509551 |             |
| {0 1 3}  | 3.70173453 | 133.74434620 | -45.07403014 |             |
| {1 1 -2} | 3.60076799 | 137.49457491 | -56.99655100 |             |

**Table S3.** The simulated parameters of the equilibrium morphology of 1,5-DHAQ single crystals.

| <i>hkl</i> | $d_{hkl}$ (Å) | Relative surface area | $E_{sur}$ (kJ mol <sup>-1</sup> ) | Total facet area (%) |
|------------|---------------|-----------------------|-----------------------------------|----------------------|
| {0 0 2}    | 7.79784775    | 31.74504553           | 0.20067129                        | 15.71804948          |
| {1 0 0}    | 6.00607893    | 82.43082881           | 0.16367914                        | 18.38006913          |

|          |            |              |            |             |
|----------|------------|--------------|------------|-------------|
| {0 1 1}  | 4.99461360 | 99.12399717  | 0.17958041 | 31.24057456 |
| {1 0 -2} | 4.92947876 | 100.43375543 | 0.24769443 | 1.04915249  |
| {1 0 2}  | 4.60376350 | 107.53942148 | 0.16412355 | 13.88432295 |
| {0 1 2}  | 4.36766418 | 113.35259398 | 0.20954184 | 0.00574329  |
| {1 1 0}  | 3.96225338 | 124.95063200 | 0.22607887 |             |
| {1 1 -1} | 3.88365974 | 127.47925858 | 0.23529001 | 0.71720738  |
| {1 1 1}  | 3.79827024 | 130.34513929 | 0.20360042 | 5.37440944  |
| {0 1 3}  | 3.70173453 | 133.74434620 | 0.22209988 | 2.56309756  |
| {1 1 -2} | 3.60076799 | 137.49457491 | 0.26027657 |             |

---
